# Supplementary material
Source: PubMed Central journal article supplement (PMC10027278)
Supplement: 482_2023_708_MOESM1_ESM.pdf [file 482_2023_708_MOESM1_ESM.pdf]

## Supplementary Material:

### 1. Fragebogen für Health Professionals

# Mitgliederumfrage zur digitalen Medizin

der **Ad-hoc Kommission eHealth** der Deutschen Schmerzgesellschaft und dem **health innovation hub** (hih) des Bundesministeriums für Gesundheit (BMG)

Sehr geehrte Kollegin, sehr geehrter Kollege,

die digitale Gesundheitsversorgung wird Einzug in unser Gesundheitssystem halten. Hieran besteht kein Zweifel. Nicht zuletzt die Corona-Pandemie hat uns gezeigt, dass ein Kontakt untereinander, die Verbindung zu unseren Patient:innen und deren eigenverantwortliche Sorge um ihre Gesundheit mit der digitalen Medizin auf einen neuen Weg gebracht werden können.

Für die tägliche Arbeit der Health Professionals (Ärzte, Pflegende, Therapeuten) bedeutet dies die elektronische Patientenakte (ePA), Telekonsile untereinander, Telekonsultationen mit unseren Patient:innen und die Verordnung von Digitalen Gesundheitsanwendungen (DiGAs) / medizinischen Apps auf im Rahmen der gesetzlichen Krankenversicherung ab dem Herbst diesen Jahres. Im Resultat bedeutet das nicht nur eine Veränderung unserer Arbeit als Health Professionals für chronische Schmerzpatient:innen, es bedeutet auch das Empowerment unserer Patienten und ihre aktivere Einbeziehung in die Therapie.

Uns interessiert daher Ihre Meinung, Erfahrung und Einschätzung zum Thema Chancen, Risiken und Zukunftswert von medizinischen Anwendungen von digitalen Methoden und medizinischen Apps im Bereich der Schmerzmedizin. Gemeinsam mit Ihrer Hilfe versuchen wir herauszufinden, worauf Health Professionals im Umgang mit digitaler Medizin Wert legen. Durch Ihre Mitarbeit an unserer Umfrage können wir dann unsere Unterstützung als Deutsche Schmerzgesellschaft und als Health Innovation Hub besser auf Sie abstimmen.

Die Umfrage dauert etwa 10 Minuten und ist streng anonym, wir erfassen keine personenbezogenen Daten. Die Ergebnisse werden wir den Mitgliedern der Deutschen Schmerzgesellschaft, dem Health Innovation Hub des BMG wie auch der interessierten Öffentlichkeit über eine Publikation zugänglich machen.

Sollten Sie Rückfragen haben, oder Ergänzungen machen wollen, die wir durch den Fragebogen nicht erfassen, können Sie uns jederzeit per Mail erreichen. Wir freuen uns über Ihre Unterstützung und möchten uns schon jetzt herzlich für Ihre Mitarbeit bedanken.

Mit herzlichen Grüßen,

Thomas R. Tölle  
Mitglied der Ad hoc Kommission eHealth

Philipp Stachwitz  
Health Innovation Hub

## Begrifflichkeiten

Um zu verdeutlichen, wie die in der Umfrage verwendeten Begriffe aus dem Bereich der digitalen Medizin zu verstehen sind, definieren wir diese im Folgenden:

### **Digitale Medizin:**

Einsatz und Nutzung von digitalen Informations- und Kommunikationstechnologien, Smart devices (wie z.B. Smartphones, Smartwatches, Wearables) und Computeranalysetechniken in der Patientenbehandlung und der Prävention von Erkrankungen durch Patient:innen und/oder Healthcare Professionals.

### **Telekonsultation/Tele-Sprechstunde:**

Kommunikation mit Patient:innen mit Hilfe digitaler Hilfsmittel zur Klärung medizinischer Fragestellungen im Sinne einer ärztlichen/therapeutischen Konsultation (also kein rein administrativer Austausch wie z.B. eine Terminvereinbarung). Hierunter fallen z.B. Videosprechstunden, Live-Chats, Messenger, E-Mail, **nicht jedoch** Telefon und Fax.

### **Telekonsil:**

Auf einen spezifischen Patienten bezogener konsiliarischer Austausch mit Kollegen (eigenes oder anderes Fachgebiet) mit Hilfe digitaler Hilfsmittel. Dies kann „live“ (z.B. Live-Chat, Videotelefonie) oder zeitversetzt (z.B. E-Mail, Messenger) erfolgen und kann, muss aber nicht die Übertragung von Bildern, Befunden etc. mit beinhalten. Hierzu zählen auch die oft schon etablierten Verfahren Teleradiologie und Telepathologie. Austausch per Telefon oder Fax ist **nicht** gemeint.

### **Digitale Gesundheitsanwendungen (DiGAs)/medizinische Apps:**

Anwendungen/Apps für Smartphone, Tablet oder Webanwendungen, die sich an Patient:innen richten und die Behandlung unterstützen. Diese Anwendungen sind einen Zulassungsprozess beim Bundesinstitut für Arzneimittel und Medizinprodukte im Hinblick auf Qualität, Sicherheit und positive Versorgungseffekte durchlaufen.

### **Digitale Klinische Entscheidungsunterstützungs-Systeme:**

Unterstützung von therapeutischen Entscheidungen (z.B. Diagnostik, Therapie) durch Algorithmen bis hin zu Systemen, die künstliche Intelligenz (KI) nutzen. Hierunter fallen z.B. Systeme, die Arzneimittel-Interaktionen prüfen/anzeigen oder bei der Analyse von Bildgebung (z.B. Radiologie) oder Morphologien (z.B. EKG, EEG) unterstützen.

### **Elektronische Patientenakte:**

Einrichtungsübergreifende, durch mehrere Healthcare Professionals gemeinsam geführte, jeweils auf eine/n Patienten/in bezogene Behandlungsdokumentation. Auch der/die Patient/in kann an der Dokumentation beteiligt sein. Formen sind z.B. die elektronische Patientenakte (ePA), elektronische Fallakten (EFA), gemeinsame Akten in Arztnetzen etc. **Nicht gemeint** ist die digitale Behandlungsdokumentation **innerhalb** einer Einrichtung mit Hilfe z.B. eines Praxisverwaltungs-, Arzt- oder Krankenhausinformationssystems (PVS, AIS, KIS).

Diese Definitionen werden Ihnen bei den jeweiligen Fragen erneut angezeigt. Sie müssen sich diese also jetzt nicht merken.

**Hinweis:**

Aus Gründen der besseren Lesbarkeit wird in der folgenden Umfrage auf die gleichzeitige Verwendung der Sprachformen männlich, weiblich und divers (m/w/d) verzichtet. Sämtliche Personenbezeichnungen gelten gleichermaßen für alle Geschlechter.

## Allgemeines

|                                                                    |    |      |
|--------------------------------------------------------------------|----|------|
| Behandeln Sie in Ihrem Alltag Patienten mit akuten Schmerzen?      | ja | nein |
| Behandeln Sie in Ihrem Alltag Patienten mit chronischen Schmerzen? | ja | nein |

## Meine Erfahrungen mit digitaler Medizin...

|                                                            |    |      |
|------------------------------------------------------------|----|------|
| Haben Sie bereits Erfahrung mit digitaler Medizin gemacht? | ja | nein |
|------------------------------------------------------------|----|------|

Wie geläufig ist mir „digitale Medizin“?

Inwieweit stimmen Sie folgenden Aussagen zu?

„0“ bedeutet dabei „gar keine Zustimmung“, „4“ bedeutet dabei „volle Zustimmung“

|                                                                     | 0 | 1 | 2 | 3 | 4 |
|---------------------------------------------------------------------|---|---|---|---|---|
| Ich fühle mich über das Thema „digitale Medizin“ gut informiert     |   |   |   |   |   |
| Ich informiere mich aktiv zum Thema „digitale Medizin“              |   |   |   |   |   |
| Mir sind konkrete/individuelle digitale Medizinanwendungen bekannt. |   |   |   |   |   |

## Meine Einstellung zum Thema digitale Medizin

Wir möchten im Folgenden erfahren, wie **Ihre Einstellung** zu einzelnen Anwendungsbereichen der digitalen Medizin ist.

Bitte kreuzen Sie für jeden Aspekt das Feld an, das Ihrer Einstellung am ehesten entspricht.

„-2“ bedeutet dabei eine sehr negative Einstellung, „2“ bedeutet eine sehr positive Einstellung

|                                                                                      | -2 | -1 | 0 | 1 | 2 |
|--------------------------------------------------------------------------------------|----|----|---|---|---|
| Telekonsultation (Austausch Health Professional - Patient)                           |    |    |   |   |   |
| Telekonsil (Austausch Health Professional- Health Professional)                      |    |    |   |   |   |
| Digitale Gesundheitsanwendungen /-Apps (DiGA /mobile health)                         |    |    |   |   |   |
| Digitale klinische Entscheidungsunterstützungs-Systeme (Expertensysteme, Leitlinien) |    |    |   |   |   |

Ich nutze bereits...

Nun möchten wir erfahren, inwieweit Sie digitale Elemente in Ihrem Behandlungsalltag **bereits nutzen**.

Bitte kreuzen Sie für jedes digitale Tool an, wie häufig Sie es nutzen.

„0“ bedeutet dabei „nie“, 4 bedeutet „immer, wenn möglich“

|                                                                                      | 0 | 1 | 2 | 3 | 4 |
|--------------------------------------------------------------------------------------|---|---|---|---|---|
| Telekonsultation: (Austausch Health Professional - Patient)                          |   |   |   |   |   |
| Telekonsil (Austausch Health Professional - Health Professional)                     |   |   |   |   |   |
| Digitale Gesundheitsanwendungen /-Apps (DiGA /mobile health)                         |   |   |   |   |   |
| Digitale klinische Entscheidungsunterstützungs-Systeme (Expertensysteme, Leitlinien) |   |   |   |   |   |

Ich sehe folgende Möglichkeiten für den Einsatz der digitalen Medizin

*Digitale Elemente können in der Patientenbehandlung vielseitig eingesetzt werden.*

Als wie **sinnvoll** schätzen Sie folgende Funktionalitäten der digitalen Medizin ein?

„0“ bedeutet dabei „gar nicht sinnvoll“, „4“ sehr sinnvoll.

|                                                                                                                                                          | 0 | 1 | 2 | 3 | 4 |
|----------------------------------------------------------------------------------------------------------------------------------------------------------|---|---|---|---|---|
| Digitale Erhebung von Anamnesedaten (allgemeine Anamnese)                                                                                                |   |   |   |   |   |
| Erfassung von spezifischen Anamnesedaten über Fragebögen                                                                                                 |   |   |   |   |   |
| Elektronische Patientenakte (einrichtungsübergreifend)                                                                                                   |   |   |   |   |   |
| Klinische Entscheidungsunterstützung                                                                                                                     |   |   |   |   |   |
| Digitales Tagebuch zur Erfassung von Symptomen oder Messwerten (z.B. Schmerz) zur Diagnostik, Therapieüberwachung etc.                                   |   |   |   |   |   |
| Digitales Tagebuch zur Erfassung von Aktivitäten, Ernährung, Therapiemaßnahmen, Medikamenteneinnahmen etc.                                               |   |   |   |   |   |
| Automatisierte Erfassung („Tracking“) von Aktivitäten z.B. über Smartphones, -watches oder Wearables                                                     |   |   |   |   |   |
| Erinnerung an Aktivitäten, Therapiemaßnahmen, Medikamenteneinnahme etc. (sog. „Nudging“)                                                                 |   |   |   |   |   |
| Wissensvermittlung an Patienten (Eduktion)                                                                                                               |   |   |   |   |   |
| Anleitung zu physiotherapeutischen Übungen                                                                                                               |   |   |   |   |   |
| Anleitung zu psychotherapeutischen Techniken (z.B. Achtsamkeit)                                                                                          |   |   |   |   |   |
| Erfassung der Behandlungszufriedenheit                                                                                                                   |   |   |   |   |   |
| Telekonsultation (Health Professional -Patient)                                                                                                          |   |   |   |   |   |
| Telekonsil (Health Professional - Health Professional)                                                                                                   |   |   |   |   |   |
| Unterstützung der intersektionalen Kommunikation (z.B. stationäre und ambulante Versorgung)                                                              |   |   |   |   |   |
| Unterstützung der Kommunikation mit dem Patienten                                                                                                        |   |   |   |   |   |
| Vernetzung von Health Professionals mit anderen Gesundheitsdienstleistern (z.B. Sportverein oder Präventionsangebote der GKV)                            |   |   |   |   |   |
| Interaktive, automatisierte Dialogsysteme mit natürlich-sprachlichen Fähigkeiten z.B. zur Beantwortung von Patientenfragen in Dialogform (sog. Chatbots) |   |   |   |   |   |

## Was stimmt mich skeptisch

Möglicherweise sehen Sie bestimmte Aspekte in der digitalen Medizin **kritisch**.

Bitte kreuzen Sie an, wie stark Sie bei nachfolgenden Aspekten Bedenken haben.

„0“ bedeutet dabei „keine Bedenken“, „4“ bedeutet „starke Bedenken“

|                                                                                 | 0 | 1 | 2 | 3 | 4 |
|---------------------------------------------------------------------------------|---|---|---|---|---|
| Gefährdung von Datenschutz und Vertraulichkeit                                  |   |   |   |   |   |
| Gefährdung der Datensicherheit durch z.B. Verlust, Zerstörung, Manipulation     |   |   |   |   |   |
| Unklare rechtliche Verantwortlichkeiten                                         |   |   |   |   |   |
| Negative Veränderung des Verhältnisses zwischen Health Professional und Patient |   |   |   |   |   |
| Probleme in der Beziehungsgestaltung zwischen Health Professional und Patienten |   |   |   |   |   |
| Verstärkung von Beschwerden (etwa sozialer Rückzug oder sozialer Phobie)        |   |   |   |   |   |
| Mangelnde Technikenkenntnisse der Patienten                                     |   |   |   |   |   |
| Mangelnde Technikenkenntnisse der Health Professionals                          |   |   |   |   |   |
| Zeitaufwand für die Health Professionals                                        |   |   |   |   |   |
| Zeitaufwand für die Patienten                                                   |   |   |   |   |   |
| Ungeklärte oder unzureichende Vergütung der Health Professionals                |   |   |   |   |   |

## Was ist Ihnen bei digitalen Gesundheitsanwendungen (DiGA)/medizinischen Apps wichtig?

Im Folgenden geht es um **Digitale Gesundheitsanwendungen/ medizinische Apps (DiGA)**.

|                                                                                                                                                                                                                   |    |      |
|-------------------------------------------------------------------------------------------------------------------------------------------------------------------------------------------------------------------|----|------|
| Ist Ihnen bekannt, dass digitale Gesundheitsanwendungen (DiGAs) ab Herbst 2020 von Ärzten und psych. Psychotherapeuten zu Lasten der gesetzlichen Krankenversicherung verordnet werden können? („App auf Rezept“) | ja | nein |
|-------------------------------------------------------------------------------------------------------------------------------------------------------------------------------------------------------------------|----|------|

*Digitale Gesundheitsanwendungen (DiGAs) können ab Herbst von Ärzten und Psychotherapeuten verordnet werden.*

Wie haben Sie hiervon **erstmal**s erfahren? Wenn Sie die vorige Frage mit „nein“ beantwortet haben, kreuzen Sie hier bitte „Ich habe davon keine Kenntnis“ an.

|                               |  |
|-------------------------------|--|
| Presse                        |  |
| Ärztchammer                   |  |
| Fachgesellschaft              |  |
| KV                            |  |
| Sonstiges                     |  |
| Ich habe davon keine Kenntnis |  |

*Digitale Gesundheitsanwendungen (Apps für Smartphone oder Tablet oder Webanwendungen, DiGA) können nur dann von Ärzten und psychologischen Psychotherapeuten verordnet werden, wenn sie gegenüber dem Bundesinstitut für Arzneimittel und Medizinprodukte (BfARM) Anforderungen an Qualität und Sicherheit erfüllen und positive Versorgungseffekte nachweisen können.*

Wie **wichtig** wären Ihnen die folgenden Aspekte, wenn Sie eine digitale Gesundheitsanwendung (DiGA) verordnen?

„0“ bedeutet dabei „gar nicht wichtig“, „4“ bedeutet „sehr wichtig“

|                                                           | 0 | 1 | 2 | 3 | 4 |
|-----------------------------------------------------------|---|---|---|---|---|
| Nachvollziehbare(r) Wirkmechanismus(en)                   |   |   |   |   |   |
| Ausgewiesene Experten an der Entwicklung beteiligt        |   |   |   |   |   |
| Wissenschaftlich nachgewiesene Wirksamkeit                |   |   |   |   |   |
| Empfehlung durch Fachgesellschaften                       |   |   |   |   |   |
| Empfehlung durch Kollegen                                 |   |   |   |   |   |
| Empfehlung durch Patienten                                |   |   |   |   |   |
| Angenehme Benutzeroberfläche für Patienten                |   |   |   |   |   |
| Einfache Bedienung für Patienten                          |   |   |   |   |   |
| Einfache Bedienung für Health Professionals               |   |   |   |   |   |
| Geringer Zeitaufwand für Patienten                        |   |   |   |   |   |
| Geringer Zeitaufwand für Health Professionals             |   |   |   |   |   |
| Eigener Zugang zu Daten der DiGA für Health Professionals |   |   |   |   |   |
| Datenschutz                                               |   |   |   |   |   |
| Geringes Risiko für den Patienten                         |   |   |   |   |   |

Glauben Sie, der Umgang mit digitalen Gesundheitsanwendungen (DiGA) / medizinischen Apps wäre für Ihre Patienten durchführbar und verständlich?

|                |  |
|----------------|--|
| gar nicht      |  |
| eher nein      |  |
| teils teils    |  |
| eher ja        |  |
| auf jeden Fall |  |

Wie wollen Sie über Digitale Gesundheitsanwendungen informiert werden?

„0“ bedeutet dabei „gar nicht“, „4“ bedeutet „auf jeden Fall“

|                                                 | 0 | 1 | 2 | 3 | 4 |
|-------------------------------------------------|---|---|---|---|---|
| Weiter- / Fortbildungsveranstaltungen (Präsenz) |   |   |   |   |   |
| Internet-basierte Weiter- / Fortbildung         |   |   |   |   |   |
| Fachliteratur                                   |   |   |   |   |   |
| Test-Accounts vom Hersteller                    |   |   |   |   |   |
| Sonstiges:                                      |   |   |   |   |   |

Von wem erwarten Sie Informationen über die verordnungsfähigen digitalen Gesundheitsanwendungen (Apps für Smartphone und Tablet, Webanwendungen, etc.)?  
(Mehrfachauswahl möglich)

„0“ bedeutet dabei „gar nicht“, „4“ bedeutet „auf jeden Fall“

|                                                             | 0 | 1 | 2 | 3 | 4 |
|-------------------------------------------------------------|---|---|---|---|---|
| Entwickler der DiGA                                         |   |   |   |   |   |
| Bundesärztekammer/Landesärztekammern                        |   |   |   |   |   |
| Medizinische Fachgesellschaften / AWMF                      |   |   |   |   |   |
| Kassenärztliche Bundesvereinigung / KVen                    |   |   |   |   |   |
| Bundesinstitut für Arzneimittel und Medizinprodukte (BfArM) |   |   |   |   |   |
| Krankenkassen                                               |   |   |   |   |   |
| Sonstiges:                                                  |   |   |   |   |   |

## Nützen mir die elektronisch erfassten Daten?

Kann, Ihrer Meinung nach, die Bereitstellung von Daten, die der Patient selbst erfasst, die Behandlung **positiv beeinflussen**?

|                |  |
|----------------|--|
| gar nicht      |  |
| eher nicht     |  |
| teils teils    |  |
| eher ja        |  |
| auf jeden Fall |  |

Welche **Art der Übermittlung** von Patientendaten, die digital gesammelt werden, würden Sie bevorzugen?

Bitte kreuzen Sie Ihren Favoriten an (nur eine Option).

|                                                        |  |
|--------------------------------------------------------|--|
| Direkt an den Praxis-/Klinikserver                     |  |
| Als E-Mail (-Anhang)                                   |  |
| Ablage in Cloud                                        |  |
| Direktes Hinzufügen in die elektronische Patientenakte |  |
| Als Ausdruck in Papierform                             |  |
| Keine gefestigte Meinung                               |  |
| Falls „Andere“ geben Sie hier Ihre Antwort ein:        |  |
|                                                        |  |

Welche **Benutzeroberfläche** zur Abfrage der Daten für Sie als Health Professional würden Sie sich wünschen?

Bitte kreuzen Sie Ihren Favoriten an (nur eine Option).

|                                                         |  |
|---------------------------------------------------------|--|
| Bereitstellung auf dem Praxis-/Klinikinformationssystem |  |
| Über eine Web-Oberfläche im Browser                     |  |
| Bereitstellung auf mobilen Endgeräten                   |  |
| E-Mail (-Anhang)                                        |  |
| Falls „Andere“ geben Sie hier Ihre Antwort ein:         |  |
|                                                         |  |

Wie ich die Zukunft sehe...

Glauben Sie, dass **in fünf Jahren** digitale Elemente eine wichtige Ergänzung in der Versorgungslandschaft sind?

|                    |  |
|--------------------|--|
| Auf keinen Fall    |  |
| Eher nicht         |  |
| Teils so, teils so |  |
| Eher ja            |  |
| Auf jeden Fall     |  |

Glauben Sie, dass **in fünf Jahren** digitale Elemente Ihren Berufsalltag verändert haben?

|                    |  |
|--------------------|--|
| Auf keinen Fall    |  |
| Eher nicht         |  |
| Teils so, teils so |  |
| Eher ja            |  |
| Auf jeden Fall     |  |

Von wem erwarten Sie sich Aufklärung und Unterstützung zum Thema Digitale Medizin im Allgemeinen?

(Mehrfachnennungen möglich)

|                                          |  |
|------------------------------------------|--|
| Bundesärztekammer/Landesärztekammern     |  |
| Bundes- und Landesgesundheitsministerien |  |
| Kassenärztliche Vereinigungen (KV)       |  |
| Medizinische Fachgesellschaften /AWMF    |  |
| Andere (Freitext)                        |  |

*Im Folgenden haben wir noch einige Fragen zu Ihrer allgemeinen Technikaffinität. Sie finden dafür eine Reihe von Aussagen. Bitte geben Sie für jede der Aussagen an, wie gut sie auf Sie persönlich zutrifft. Kreuzen Sie dazu auf der rechten Seite das Feld an, das Ihrer Meinung am besten entspricht.*

|                                                                                               | Trifft voll zu | Trifft eher zu | Teils-teils | Trifft eher nicht zu | Trifft gar nicht zu |
|-----------------------------------------------------------------------------------------------|----------------|----------------|-------------|----------------------|---------------------|
| Ich liebe es, neue elektronische Geräte zu besitzen.                                          |                |                |             |                      |                     |
| Elektronische Geräte machen krank.                                                            |                |                |             |                      |                     |
| Ich gehe gern in den Fachhandel für elektronische Geräte.                                     |                |                |             |                      |                     |
| Ich habe bzw. hätte Verständnisprobleme beim Lesen von Elektronik- und Computerzeitschriften. |                |                |             |                      |                     |
| Elektronische Geräte ermöglichen einen hohen Lebensstandard.                                  |                |                |             |                      |                     |
| Elektronische Geräte führen zu geistiger Verarmung.                                           |                |                |             |                      |                     |
| Elektronische Geräte machen vieles umständlicher.                                             |                |                |             |                      |                     |
| Ich informiere mich über elektronische Geräte, auch wenn ich keine Kaufabsicht habe.          |                |                |             |                      |                     |
| Elektronische Geräte machen unabhängig.                                                       |                |                |             |                      |                     |
| Es macht mir Spaß, ein elektronisches Gerät auszuprobieren.                                   |                |                |             |                      |                     |
| Elektronische Geräte erleichtern mir den Alltag.                                              |                |                |             |                      |                     |
| Elektronische Geräte erhöhen die Sicherheit.                                                  |                |                |             |                      |                     |
| Elektronische Geräte verringern den persönlichen Kontakt zwischen den Menschen.               |                |                |             |                      |                     |
| Ich kenne die meisten Funktionen der elektronischen Geräte, die ich besitze.                  |                |                |             |                      |                     |
| Ich bin begeistert, wenn ein neues elektronisches Gerät auf den Markt kommt.                  |                |                |             |                      |                     |
| Elektronische Geräte verursachen Stress.                                                      |                |                |             |                      |                     |
| Ich kenne mich im Bereich elektronischer Geräte aus.                                          |                |                |             |                      |                     |
| Es fällt mir leicht, die Bedienung eines elektronischen Geräts zu lernen.                     |                |                |             |                      |                     |
| Elektronische Geräte helfen, an Informationen zu gelangen.                                    |                |                |             |                      |                     |

## Demographische Daten:

Welches Geschlecht haben Sie?

|          |  |
|----------|--|
| Männlich |  |
| Weiblich |  |
| Divers   |  |

Welche Fachrichtung gehören Sie an? Bitte nennen Sie beim Zutreffen mehrerer Bezeichnungen diejenige, die Ihrem aktuellen Aufgabengebiet am nächsten kommt.

|                              |  |
|------------------------------|--|
| Allgemeinmedizin             |  |
| Orthopädie                   |  |
| Neurologie                   |  |
| Anästhesie                   |  |
| Innere Medizin               |  |
| Psychologie / Psychotherapie |  |
| Schmerzmedizin               |  |
| Ergotherapie                 |  |
| Physiotherapie               |  |
| Pflege                       |  |
| Andere:                      |  |
|                              |  |

Bitte geben Sie Ihr Alter an. \_\_\_\_\_

In welchem geographischen Umfeld arbeiten Sie?

|                                          |  |
|------------------------------------------|--|
| Millionenstadt                           |  |
| Großstadt (>100.000 Einwohner)           |  |
| Mittelstadt (20.000 – 100.000 Einwohner) |  |
| Kleinstadt (<20.000 Einwohner)           |  |
| Dorf                                     |  |

Wie würden Sie die schmerzmedizinische Versorgungssituation in Ihrer Region beschreiben?  
Vergeben Sie eine Schulnote (1-6).

\_\_\_\_\_

## 2. Umfrage für Patienten

# Umfrage zur digitalen Medizin

der **Ad-hoc Kommission eHealth** der Deutschen Schmerzgesellschaft und dem **health innovation hub** (hih) des Bundesministeriums für Gesundheit (BMG)

Sehr geehrte Patientin, sehr geehrter Patient,

die digitale Gesundheitsversorgung wird Einzug in unser Gesundheitssystem halten. Hieran besteht kein Zweifel. Nicht zuletzt die Corona-Pandemie hat uns gezeigt, dass der Kontakt Therapeut:innen und Patient:innen und die eigenverantwortliche Sorge um Ihre Gesundheit mit der digitalen Medizin auf einen neuen Weg gebracht werden können.

Für den Behandlungsalltag bedeutet dies eine elektronische Patientenakte, Telesprechstunden zwischen Patient und Health Professionals (Ärzte, Pflegende, Therapeuten), Telekonsile zwischen Health Professionals untereinander und die Verordnung von Digitalen Gesundheitsanwendungen (DiGAs) / medizinischen Apps auf im Rahmen der gesetzlichen Krankenversicherung ab dem Herbst diesen Jahres.

Uns interessiert daher Ihre Meinung, Erfahrung und Einschätzung zum Thema Chancen, Risiken und Zukunftswert von medizinischen Anwendungen von digitalen Methoden und medizinischen Apps im Bereich der Schmerzmedizin. Gemeinsam mit Ihrer Hilfe versuchen wir herauszufinden, worauf Patienten im Umgang mit digitaler Medizin Wert legen. Durch Ihre Mitarbeit an unserer Umfrage können wir dann unsere Unterstützung als Deutsche Schmerzgesellschaft und als Health Innovation Hub besser auf Sie abstimmen.

Die Umfrage dauert etwa 10 Minuten und ist streng anonym, wir erfassen keine personenbezogenen Daten. Die Ergebnisse werden wir den Mitgliedern der Deutschen Schmerzgesellschaft, dem Health Innovation Hub des BMG wie auch der interessierten Öffentlichkeit über eine Publikation zugänglich machen.

Sollten Sie Rückfragen haben, oder Ergänzungen machen wollen, die wir durch den Fragebogen nicht erfassen, können Sie uns jederzeit per Mail erreichen. Wir freuen uns über Ihre Unterstützung und möchten uns schon jetzt herzlich für Ihre Mitarbeit bedanken.

Mit herzlichen Grüßen,

Thomas R. Tölle  
Mitglied der Ad hoc Kommission eHealth  
Deutsche Schmerzgesellschaft

Philipp Stachwitz  
Health Innovation Hub

## Begrifflichkeiten

Um zu verdeutlichen, wie die in der Umfrage verwendeten Begriffe aus dem Bereich der digitalen Medizin zu verstehen sind, definieren wir diese im Folgenden:

### **Digitale Medizin:**

Einsatz und Nutzung von digitalen Informations- und Kommunikationstechnologien, Smart devices (wie z.B. Smartphones, Smartwatches, Wearables) und Computeranalysetechniken in der Patientenbehandlung und der Prävention von Erkrankungen durch Patient:innen und/oder Healthcare Professionals.

### **Telekonsultation/Tele-Sprechstunde:**

Kommunikation von Health Professionals mit Patient:innen mit Hilfe digitaler Hilfsmittel zur Klärung medizinischer Fragestellungen im Sinne einer ärztlichen/therapeutischen Konsultation (also kein rein administrativer Austausch wie z.B. eine Terminvereinbarung). Hierunter fallen z.B. Videosprechstunden, Live-Chats, Messenger, E-Mail, **nicht jedoch** Telefon und Fax.

### **Telekonsil:**

Auf einen spezifischen Patienten bezogener konsiliarischer Austausch zwischen Health Professionals (eigenes oder anderes Fachgebiet) mit Hilfe digitaler Hilfsmittel. Dies kann „live“ (z.B. Live-Chat, Videotelefonie) oder zeitversetzt (z.B. E-Mail, Messenger) erfolgen und kann, muss aber nicht die Übertragung von Bildern, Befunden etc. mit beinhalten. Hierzu zählen auch die oft schon etablierten Verfahren Teleradiologie und Telepathologie. Austausch per Telefon oder Fax ist **nicht** gemeint.

### **Digitale Gesundheitsanwendungen (DiGAs)/medizinische Apps:**

Anwendungen/Apps für Smartphone, Tablet oder Webanwendungen, die sich an Patient:innen richten und die Behandlung unterstützen. Diese Anwendungen sind einen Zulassungsprozess beim Bundesinstitut für Arzneimittel und Medizinprodukte im Hinblick auf Qualität, Sicherheit und positive Versorgungseffekte durchlaufen.

### **Digitale Klinische Entscheidungsunterstützungs-Systeme:**

Unterstützung von therapeutischen Entscheidungen (z.B. Diagnostik, Therapie) durch Algorithmen bis hin zu Systemen, die künstliche Intelligenz (KI) nutzen. Hierunter fallen z.B. Systeme, die Arzneimittel-Interaktionen prüfen/anzeigen oder bei der Analyse von Bildgebung (z.B. Radiologie) oder Morphologien (z.B. EKG, EEG) unterstützen.

### **Elektronische Patientenakte:**

Einrichtungsübergreifende, durch mehrere Healthcare Professionals gemeinsam geführte, jeweils auf eine/n Patienten/in bezogene Behandlungsdokumentation. Auch der/die Patient/in kann an der Dokumentation beteiligt sein. Formen sind z.B. die elektronische Patientenakte (ePA), elektronische Fallakten (EFA), gemeinsame Akten in Arztnetzen etc. **Nicht gemeint** ist die digitale Behandlungsdokumentation **innerhalb** einer Einrichtung mit Hilfe z.B. eines Praxisverwaltungs-, Arzt- oder Krankenhausinformationssystems (PVS, AIS, KIS).

Diese Definitionen werden Ihnen bei den jeweiligen Fragen erneut angezeigt. Sie müssen sich diese also jetzt nicht merken.

**Hinweis:**

Aus Gründen der besseren Lesbarkeit wird in der folgenden Umfrage auf die gleichzeitige Verwendung der Sprachformen männlich, weiblich und divers (m/w/d) verzichtet. Sämtliche Personenbezeichnungen gelten gleichermaßen für alle Geschlechter.

## Allgemeines

|                                                                     |    |      |
|---------------------------------------------------------------------|----|------|
| Befinden Sie sich aufgrund von chronischen Schmerzen in Behandlung? | ja | Nein |
|---------------------------------------------------------------------|----|------|

Seit wann bestehen diese Schmerzen?

|                  |  |
|------------------|--|
| Bis ½ Jahr       |  |
| ½ bis 1 Jahr     |  |
| 1 bis 2 Jahre    |  |
| 2 bis 5 Jahre    |  |
| Mehr als 5 Jahre |  |

## Meine Erfahrungen mit digitaler Medizin...

|                                                            |    |      |
|------------------------------------------------------------|----|------|
| Haben Sie bereits Erfahrung mit digitaler Medizin gemacht? | ja | nein |
|------------------------------------------------------------|----|------|

Wie geläufig ist mir „digitale Medizin“?

Inwieweit stimmen Sie folgenden Aussagen zu?

„0“ bedeutet dabei „gar keine Zustimmung“, „4“ bedeutet dabei „volle Zustimmung“

|                                                                                                 | 0 | 1 | 2 | 3 | 4 |
|-------------------------------------------------------------------------------------------------|---|---|---|---|---|
| Ich fühle mich über das Thema „digitale Medizin“ gut informiert                                 |   |   |   |   |   |
| Ich informiere mich aktiv zum Thema „digitale Medizin“                                          |   |   |   |   |   |
| Mir sind konkrete/individuelle digitale Gesundheitsanwendungen (DiGA)/medizinische Apps bekannt |   |   |   |   |   |

Meine Einstellung zum Thema digitale Medizin

Im Folgenden geht es um **Ihre Einstellung** zur digitalen Medizin.

Bitte kreuzen Sie für jeden Aspekt das Feld an, das Ihrer Einstellung am ehesten entspricht.

„-2“ bedeutet dabei „eine sehr negative Einstellung“, „2“ bedeutet dabei „eine sehr positive Einstellung“

|                                                                                                        | -2 | -1 | 0 | 1 | 2 |
|--------------------------------------------------------------------------------------------------------|----|----|---|---|---|
| Telekonsultation/Tele-Sprechstunde<br>(Arzt/Psychotherapeut - Patient)                                 |    |    |   |   |   |
| Telekonsil (Austausch zwischen Ärzten,<br>Psychotherapeuten oder anderen medizinischen<br>Fachkräften) |    |    |   |   |   |
| Digitale Gesundheitsanwendungen /-Apps (DiGA<br>/mobile health)                                        |    |    |   |   |   |
| Digitale klinische Entscheidungsunterstützungs-<br>Systeme (Expertensysteme, Leitlinien)               |    |    |   |   |   |

Im Rahmen meiner Behandlung wurden oder werden genutzt...

„0“ bedeutet dabei „nie“, 4 bedeutet „immer, wenn möglich“

|                                                                                                                                    | 0 | 1 | 2 | 3 | 4 |
|------------------------------------------------------------------------------------------------------------------------------------|---|---|---|---|---|
| Telekonsultation/Tele-Sprechstunde (zwischen<br>Patienten und Ärzten, Psychotherapeuten oder<br>anderen medizinischen Fachkräften) |   |   |   |   |   |
| Telekonsil (zwischen Ärzten, Psychotherapeuten oder<br>anderen medizinischen Fachkräften und ihren<br>Patienten)                   |   |   |   |   |   |
| Digitale Gesundheitsanwendungen /-Apps (DiGA<br>/mobile health)                                                                    |   |   |   |   |   |
| Digitale Klinische Entscheidungsunterstützungs-<br>Systeme (Expertensysteme, Leitlinien)                                           |   |   |   |   |   |

Ich sehe folgende Möglichkeiten für den Einsatz der digitalen Medizin...

Als wie **sinnvoll** schätzen Sie folgende Funktionalitäten der digitalen Medizin ein?

„0“ bedeutet dabei „gar nicht sinnvoll“, „4“ bedeutet dabei „sehr sinnvoll“

|                                                                                                                                                                                     | 0 | 1 | 2 | 3 | 4 |
|-------------------------------------------------------------------------------------------------------------------------------------------------------------------------------------|---|---|---|---|---|
| Elektronische Patientenakte (einrichtungsübergreifend)                                                                                                                              |   |   |   |   |   |
| Klinische Entscheidungsunterstützungs-Systeme                                                                                                                                       |   |   |   |   |   |
| Digitales Tagebuch zur Erfassung von Symptomen oder Messwerten (z.B. Schmerz) zur Diagnostik, Therapieüberwachung etc.                                                              |   |   |   |   |   |
| Digitales Tagebuch zur Erfassung von Aktivitäten, Ernährung, Therapiemaßnahmen, Medikamenteneinnahmen etc.                                                                          |   |   |   |   |   |
| Automatisierte Erfassung („Tracking“) von Aktivitäten z.B. über Smartphones, -watches oder Wearables                                                                                |   |   |   |   |   |
| Erinnerung an Aktivitäten, Therapiemaßnahmen, Medikamenteneinnahme etc.                                                                                                             |   |   |   |   |   |
| Digitale Erhebung von Informationen zu meinem gesundheitlichen Status und meinen Beschwerden                                                                                        |   |   |   |   |   |
| Wissensvermittlung an Patienten (über die Hintergründe von und den Umgang mit chronischen Schmerzen)                                                                                |   |   |   |   |   |
| Interaktive, automatisierte Dialogsysteme mit natürlich-sprachlichen Fähigkeiten z.B. zur Beantwortung von Patientenfragen in Dialogform (sog. Chatbots)                            |   |   |   |   |   |
| Unterstützung der Kommunikation zwischen Patienten und Ärzten, Psychotherapeuten oder anderen medizinischen Fachkräften                                                             |   |   |   |   |   |
| Vernetzung von Ärzten, Psychotherapeuten oder anderen medizinischen Fachkräften mit anderen Gesundheitsdienstleistern (z.B. Sportverein oder Präventionsangebote der Krankenkassen) |   |   |   |   |   |
| Anleitung zu psychotherapeutischen Techniken (z.B. Achtsamkeit)                                                                                                                     |   |   |   |   |   |
| Anleitung zu physiotherapeutischen Übungen                                                                                                                                          |   |   |   |   |   |
| Telekonsultation/Tele-Sprechstunde (zwischen Ärzten, Psychotherapeuten oder anderen medizinischen Fachkräften und ihren Patienten)                                                  |   |   |   |   |   |
| Erfassung der Behandlungszufriedenheit                                                                                                                                              |   |   |   |   |   |
| Telekonsil (Austausch zwischen zwei Ärzten, Psychotherapeuten oder anderen medizinischen Fachkräften)                                                                               |   |   |   |   |   |
| Unterstützung der intersektoralen Kommunikation (z.B. Austausch von Behandlungsdaten zwischen Krankenhaus und Arztpraxis)                                                           |   |   |   |   |   |

## Was stimmt mich skeptisch

Bitte kreuzen Sie an, wie stark Sie bei nachfolgenden Aspekten **Bedenken** haben.

„0“ bedeutet dabei „keine Bedenken“, „4“ bedeutet dabei „starke Bedenken“

|                                                                                                                                | 0 | 1 | 2 | 3 | 4 |
|--------------------------------------------------------------------------------------------------------------------------------|---|---|---|---|---|
| Gefährdung von Datenschutz und Vertraulichkeit                                                                                 |   |   |   |   |   |
| Gefährdung der Datensicherheit durch z.B. Verlust, Zerstörung, Manipulation                                                    |   |   |   |   |   |
| Negative Veränderung des Verhältnisses zwischen Patienten und Ärzten, Psychotherapeuten oder anderen medizinischen Fachkräften |   |   |   |   |   |
| Mangelnde Technikenntnisse der Ärzte, Psychotherapeuten oder anderer medizinischer Fachkräfte                                  |   |   |   |   |   |
| Probleme in der Beziehungsgestaltung zwischen Patienten und Ärzten, Psychotherapeuten oder anderen medizinischen Fachkräften   |   |   |   |   |   |
| Zeitaufwand für Ärzten, Psychotherapeuten oder andere medizinische Fachkräfte                                                  |   |   |   |   |   |
| Zeitaufwand für die Patienten                                                                                                  |   |   |   |   |   |
| Mangelnde Technikenntnisse der Patienten                                                                                       |   |   |   |   |   |

Was ist Ihnen bei digitalen Gesundheitsanwendungen (DiGA)/medizinischen Apps wichtig?

Im Folgenden geht es um **Digitale Gesundheitsanwendungen/ medizinische Apps (DiGA)**.

|                                                                                                                                                                                                                                        |    |      |
|----------------------------------------------------------------------------------------------------------------------------------------------------------------------------------------------------------------------------------------|----|------|
| Ist Ihnen bekannt, dass digitale Gesundheitsanwendungen (DiGA)/medizinische Apps ab Herbst 2020 von Ärzten und psychologischen Psychotherapeuten für ihre Patienten auf einem Kassenrezept verordnet werden können? („App auf Rezept“) | ja | nein |
|----------------------------------------------------------------------------------------------------------------------------------------------------------------------------------------------------------------------------------------|----|------|

Wie haben Sie hiervon **erstmal**s erfahren?

|                                                                  |  |
|------------------------------------------------------------------|--|
| Presse, Fernsehen oder Internet                                  |  |
| Krankenkassen                                                    |  |
| Ärzten, Psychotherapeuten oder anderen medizinischen Fachkräften |  |
| Verbraucher-, Patienten- oder Selbsthilfeorganisationen          |  |
| Sonstiges                                                        |  |

## Was ist Ihnen bei digitalen Gesundheitsanwendungen (DiGA)/medizinischen Apps wichtig?

Wie **wichtig** wären Ihnen die folgenden Aspekte, wenn Sie eine digitale Gesundheitsanwendung (DiGA)/medizinische App verordnen?

„0“ bedeutet dabei „gar nicht wichtig“, „4“ bedeutet dabei „sehr wichtig“

|                                                                                       | 0 | 1 | 2 | 3 | 4 |
|---------------------------------------------------------------------------------------|---|---|---|---|---|
| Ausgewiesene Experten an der Entwicklung beteiligt                                    |   |   |   |   |   |
| Dass ich die Wirkungsweise der Anwendung verstehe                                     |   |   |   |   |   |
| Wissenschaftlich nachgewiesene Wirksamkeit                                            |   |   |   |   |   |
| Datenschutz                                                                           |   |   |   |   |   |
| Geringes Risiko für den Patienten                                                     |   |   |   |   |   |
| Geringer Zeitaufwand für Ärzte, Psychotherapeuten oder andere medizinische Fachkräfte |   |   |   |   |   |
| Empfehlung durch Ärzte, Psychotherapeuten oder anderen medizinische Fachkräfte        |   |   |   |   |   |
| Empfehlung durch medizinische Fachgesellschaften                                      |   |   |   |   |   |
| Empfehlung durch andere Patienten                                                     |   |   |   |   |   |
| Angenehme Benutzeroberfläche für Patienten                                            |   |   |   |   |   |
| Empfehlung durch Patienten- oder Selbsthilfeorganisationen                            |   |   |   |   |   |
| Einfache Bedienung für Ärzte, Psychotherapeuten oder andere medizinische Fachkräfte   |   |   |   |   |   |
| Einfache Bedienung für Patienten                                                      |   |   |   |   |   |

Wie ich die Zukunft sehe...

Glauben Sie, dass **in fünf Jahren** digitale Elemente eine wichtige Ergänzung in der Versorgung sind?

|                    |  |
|--------------------|--|
| Auf keinen Fall    |  |
| Eher nicht         |  |
| Teils so, teils so |  |
| Eher ja            |  |
| Auf jeden Fall     |  |

Von wem erwarten Sie sich Aufklärung und Unterstützung zum Thema Digitale Medizin im Allgemeinen? (Mehrfachnennungen möglich)

|                                                     |  |
|-----------------------------------------------------|--|
| Hausärzten                                          |  |
| Fachärzten                                          |  |
| Krankenkassen                                       |  |
| Verbraucherorganisationen / Patientenorganisationen |  |
| Sonstiges (Freitext)                                |  |

# Technikaffinität

Im Folgenden haben wir noch einige Fragen zu Ihrer allgemeinen Technikaffinität. Sie finden dafür Sie eine Reihe von Aussagen. Bitte geben Sie für jede der Aussagen an, wie gut sie auf Sie persönlich zutrifft.

|                                                                                               | Trifft voll zu | Trifft eher zu | Teils-teils | Trifft eher nicht zu | Trifft gar nicht zu |
|-----------------------------------------------------------------------------------------------|----------------|----------------|-------------|----------------------|---------------------|
| Ich liebe es, neue elektronische Geräte zu besitzen.                                          |                |                |             |                      |                     |
| Elektronische Geräte machen krank.                                                            |                |                |             |                      |                     |
| Ich habe bzw. hätte Verständnisprobleme beim Lesen von Elektronik- und Computerzeitschriften. |                |                |             |                      |                     |
| Es fällt mir leicht, die Bedienung eines elektronischen Geräts zu lernen.                     |                |                |             |                      |                     |
| Elektronische Geräte helfen, an Informationen zu gelangen.                                    |                |                |             |                      |                     |
| Ich kenne mich im Bereich elektronischer Geräte aus.                                          |                |                |             |                      |                     |
| Elektronische Geräte führen zu geistiger Verarmung.                                           |                |                |             |                      |                     |
| Elektronische Geräte ermöglichen einen hohen Lebensstandard.                                  |                |                |             |                      |                     |
| Ich gehe gern in den Fachhandel für elektronische Geräte.                                     |                |                |             |                      |                     |
| Elektronische Geräte machen vieles umständlicher.                                             |                |                |             |                      |                     |
| Ich informiere mich über elektronische Geräte, auch wenn ich keine Kaufabsicht habe.          |                |                |             |                      |                     |
| Elektronische Geräte machen unabhängig.                                                       |                |                |             |                      |                     |
| Es macht mir Spaß, ein elektronisches Gerät auszuprobieren.                                   |                |                |             |                      |                     |
| Elektronische Geräte erleichtern mir den Alltag.                                              |                |                |             |                      |                     |
| Elektronische Geräte erhöhen die Sicherheit.                                                  |                |                |             |                      |                     |
| Elektronische Geräte verringern den persönlichen Kontakt zwischen den Menschen.               |                |                |             |                      |                     |
| Ich kenne die meisten Funktionen der elektronischen Geräte, die ich besitze.                  |                |                |             |                      |                     |
| Ich bin begeistert, wenn ein neues elektronisches Gerät auf den Markt kommt.                  |                |                |             |                      |                     |
| Elektronische Geräte verursachen Stress.                                                      |                |                |             |                      |                     |

## Demographische Daten:

Welches Geschlecht haben Sie?

|          |  |
|----------|--|
| männlich |  |
| weiblich |  |
| divers   |  |

Wie würden Sie die schmerzmedizinische Versorgungssituation in Ihrer Region beschreiben?  
Vergeben Sie eine Schulnote (1-6).

„1“ bedeutet dabei „sehr gut“, „6“ bedeutet dabei „ungenügend“

|   |  |
|---|--|
| 1 |  |
| 2 |  |
| 3 |  |
| 4 |  |
| 5 |  |
| 6 |  |

In welchem geographischen Umfeld leben Sie?

|                                          |  |
|------------------------------------------|--|
| Millionenstadt                           |  |
| Großstadt (>100.000 Einwohner)           |  |
| Mittelstadt (20.000 – 100.000 Einwohner) |  |
| Kleinstadt (<20.000 Einwohner)           |  |
| Dorf                                     |  |

Bitte geben Sie ihr Alter an.

|             |  |
|-------------|--|
| Unter 20    |  |
| 20 bis 40   |  |
| 40 bis 60   |  |
| 60 bis 80   |  |
| 80 und mehr |  |
